# Supplementary material
Source: PubMed Central journal article supplement (PMC3591996)
Supplement: JB.01488-12_zjb999092485so1.pdf [file JB.01488-12_zjb999092485so1.pdf]

**Table S1.** Oligonucleotides used in this work

| Name            | Sequence 5'-3'               |
|-----------------|------------------------------|
| A7120 THRS2-1F  | TTTATTCATATGGTCAGTTCCTTAAC   |
| A7120 THRS2-1R  | CGTATATTCAACTCGAGCAATCTGC    |
| NIR-2F          | ACCAAGATCTTTAGCTACTCATTAG    |
| NIR-1R          | GTCCCATGGTTTGTGTGAATCCTTATG  |
| 24STREP-1F      | GTAGCGCTCGAGGTCAAATC         |
| 22DEL-1R        | TGGCTAGGATCCTCATGATTATG      |
| 22DEL-1F        | TTTACAAATACAAAATCCTTAAGCAG   |
| 24DEL-1R        | ATTAATAAATAATGAGAATCGTTATCAT |
| 25R             | AAATCATCCACTGTCAGG           |
| 23R             | GAAATAACTTCTGTACTGCCA        |
| 22R             | GTTGTTTCTGCGGTTAG            |
| 21R             | ATAAAGTCATGTTATTTTCG         |
| 4722LUX-1F      | GTAAGAACTCGAGCAAATGGTG       |
| 4722LUX-1R      | CTGCTTAAGGATCCTGTATTTG       |
| ALL4721-3F      | CATACTCGAGCTAAGAACCAATTGG    |
| ALL4721-4R      | GTAGGGATCCTGAGTTAGTTAATAG    |
| ALL4725_3F      | GATAGTGAGCTCGGTATTGGC        |
| ALL4725_6R      | CGGGATCCCCTAGCTATGATAC       |
| ALL4725_BOX35_F | CGTTCCTACCCCTGAGAAATG        |
| ALL4725_BOX35_R | CATTCTCAGGGTAGGAACG          |
| ALL4725_BOX10_F | TTCCATGCGCGCAATGGTTA         |
| ALL4725_BOX10_R | TAACCATTGCGCGCATGGAA         |
| ALL4723_3F      | AAACCAAGCAGAGCTCTTTCCC       |
| ALL4723_10R     | GTGCGGATCCCTTATCGTTG         |
| ALL4723_BOX35_F | ATAGTCATCCTGAGTCCGCC         |
| ALL4723_BOX35_R | GGCGGACTCAGGATGACTAT         |
| ALL4723_BOX10_F | TTTTTGCGCGCGCGGATAA          |
| ALL4723_BOX10_R | TTATCGCGCGCGCAAAAA           |
| ALL4722_6F      | GAAATAGAGCTCAGTGGCGAG        |
| ALL4722_8R      | GGGAATTCAGGAATTATG           |
| ALL4722_BOX35_F | AATGATCCTGAGAATCACTTAC       |
| ALL4722_BOX35_R | GTAAGTGATTCTCAGGATCATT       |
| ALL4722_BOX10_F | GAGAAACGCGCGCTGCCAAG         |
| ALL4722_BOX10_R | CTTGGCAGCGCGGTTTCTC          |
| ALL4721_4F      | GTGATAGTGAGCTCCGCCAT         |
| ALL4721_5R      | CATCCAAGGATCCATTCTATCC       |
| ALL4721_BOX35_F | CAAATTTACCTGAGACTTAAC        |
| ALL4721_BOX35_R | GTTAAGTCTCAGGTAAATTTG        |
| ALL4721_BOX10_F | TGTTTGGGCGCGCTAAGAAG         |
| ALL4721_BOX10_R | CTTCTTAGCGCGCCAAACA          |
| CK3-1           | CAGAGCAGCCGATTGTCTGTTG       |
| CK3-2           | CTGATAAGTGAGCTATTCAC         |

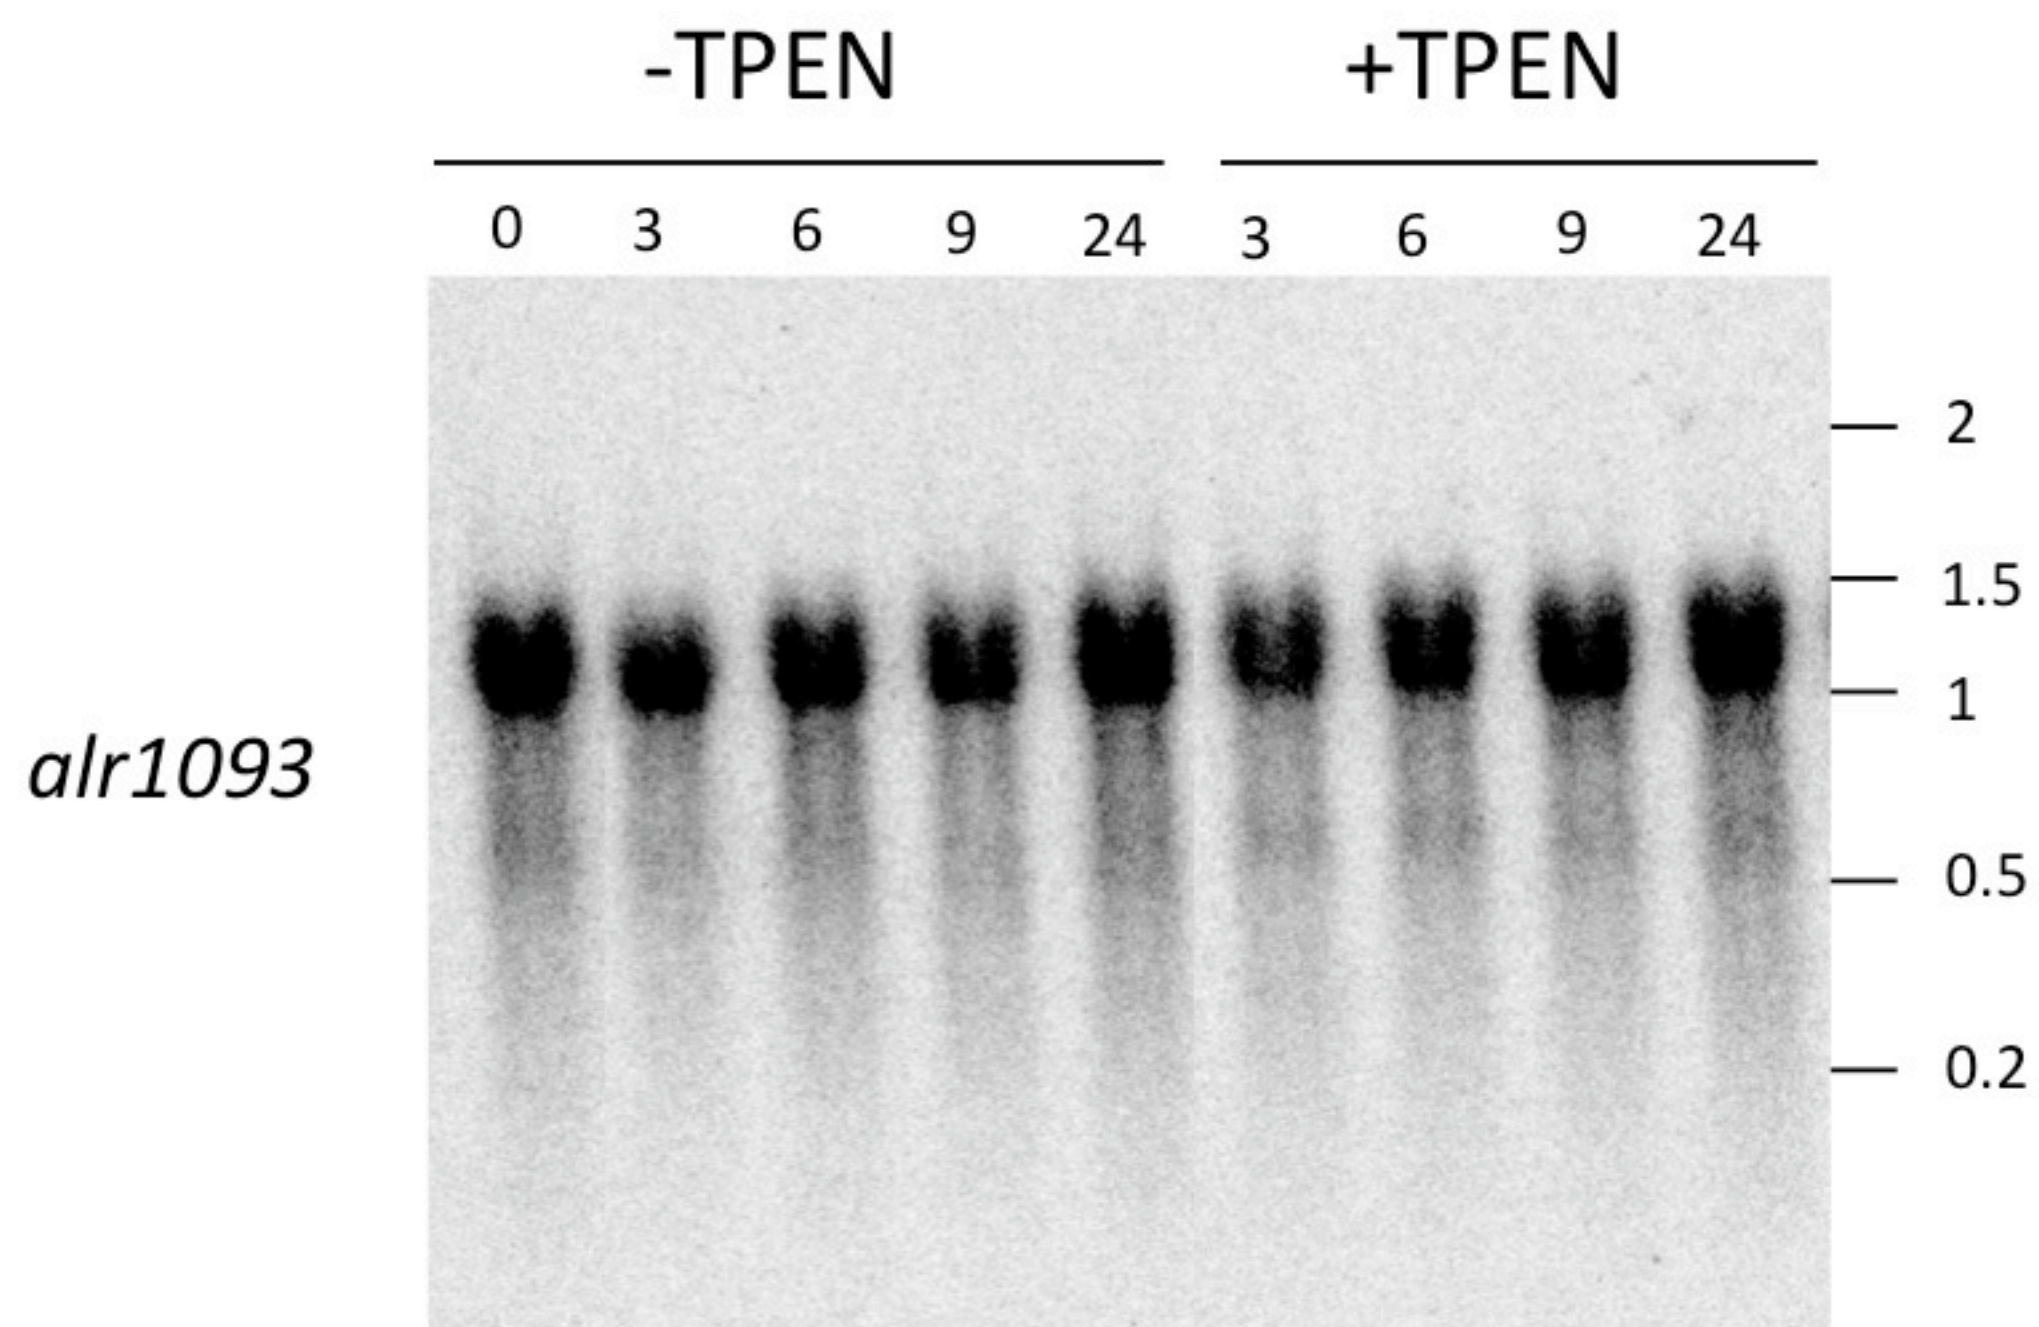

Fig. S1. Expression of the *alr1093* gene in the absence or presence of TPEN. A Northern blot assay was carried out with RNA from cells cultured in the absence or presence of 20  $\mu$ M TPEN for the time indicated in hours at the top and an internal DNA probe of the *alr1093* gene. The positions of molecular weight markers are indicated at the right (in Kb).

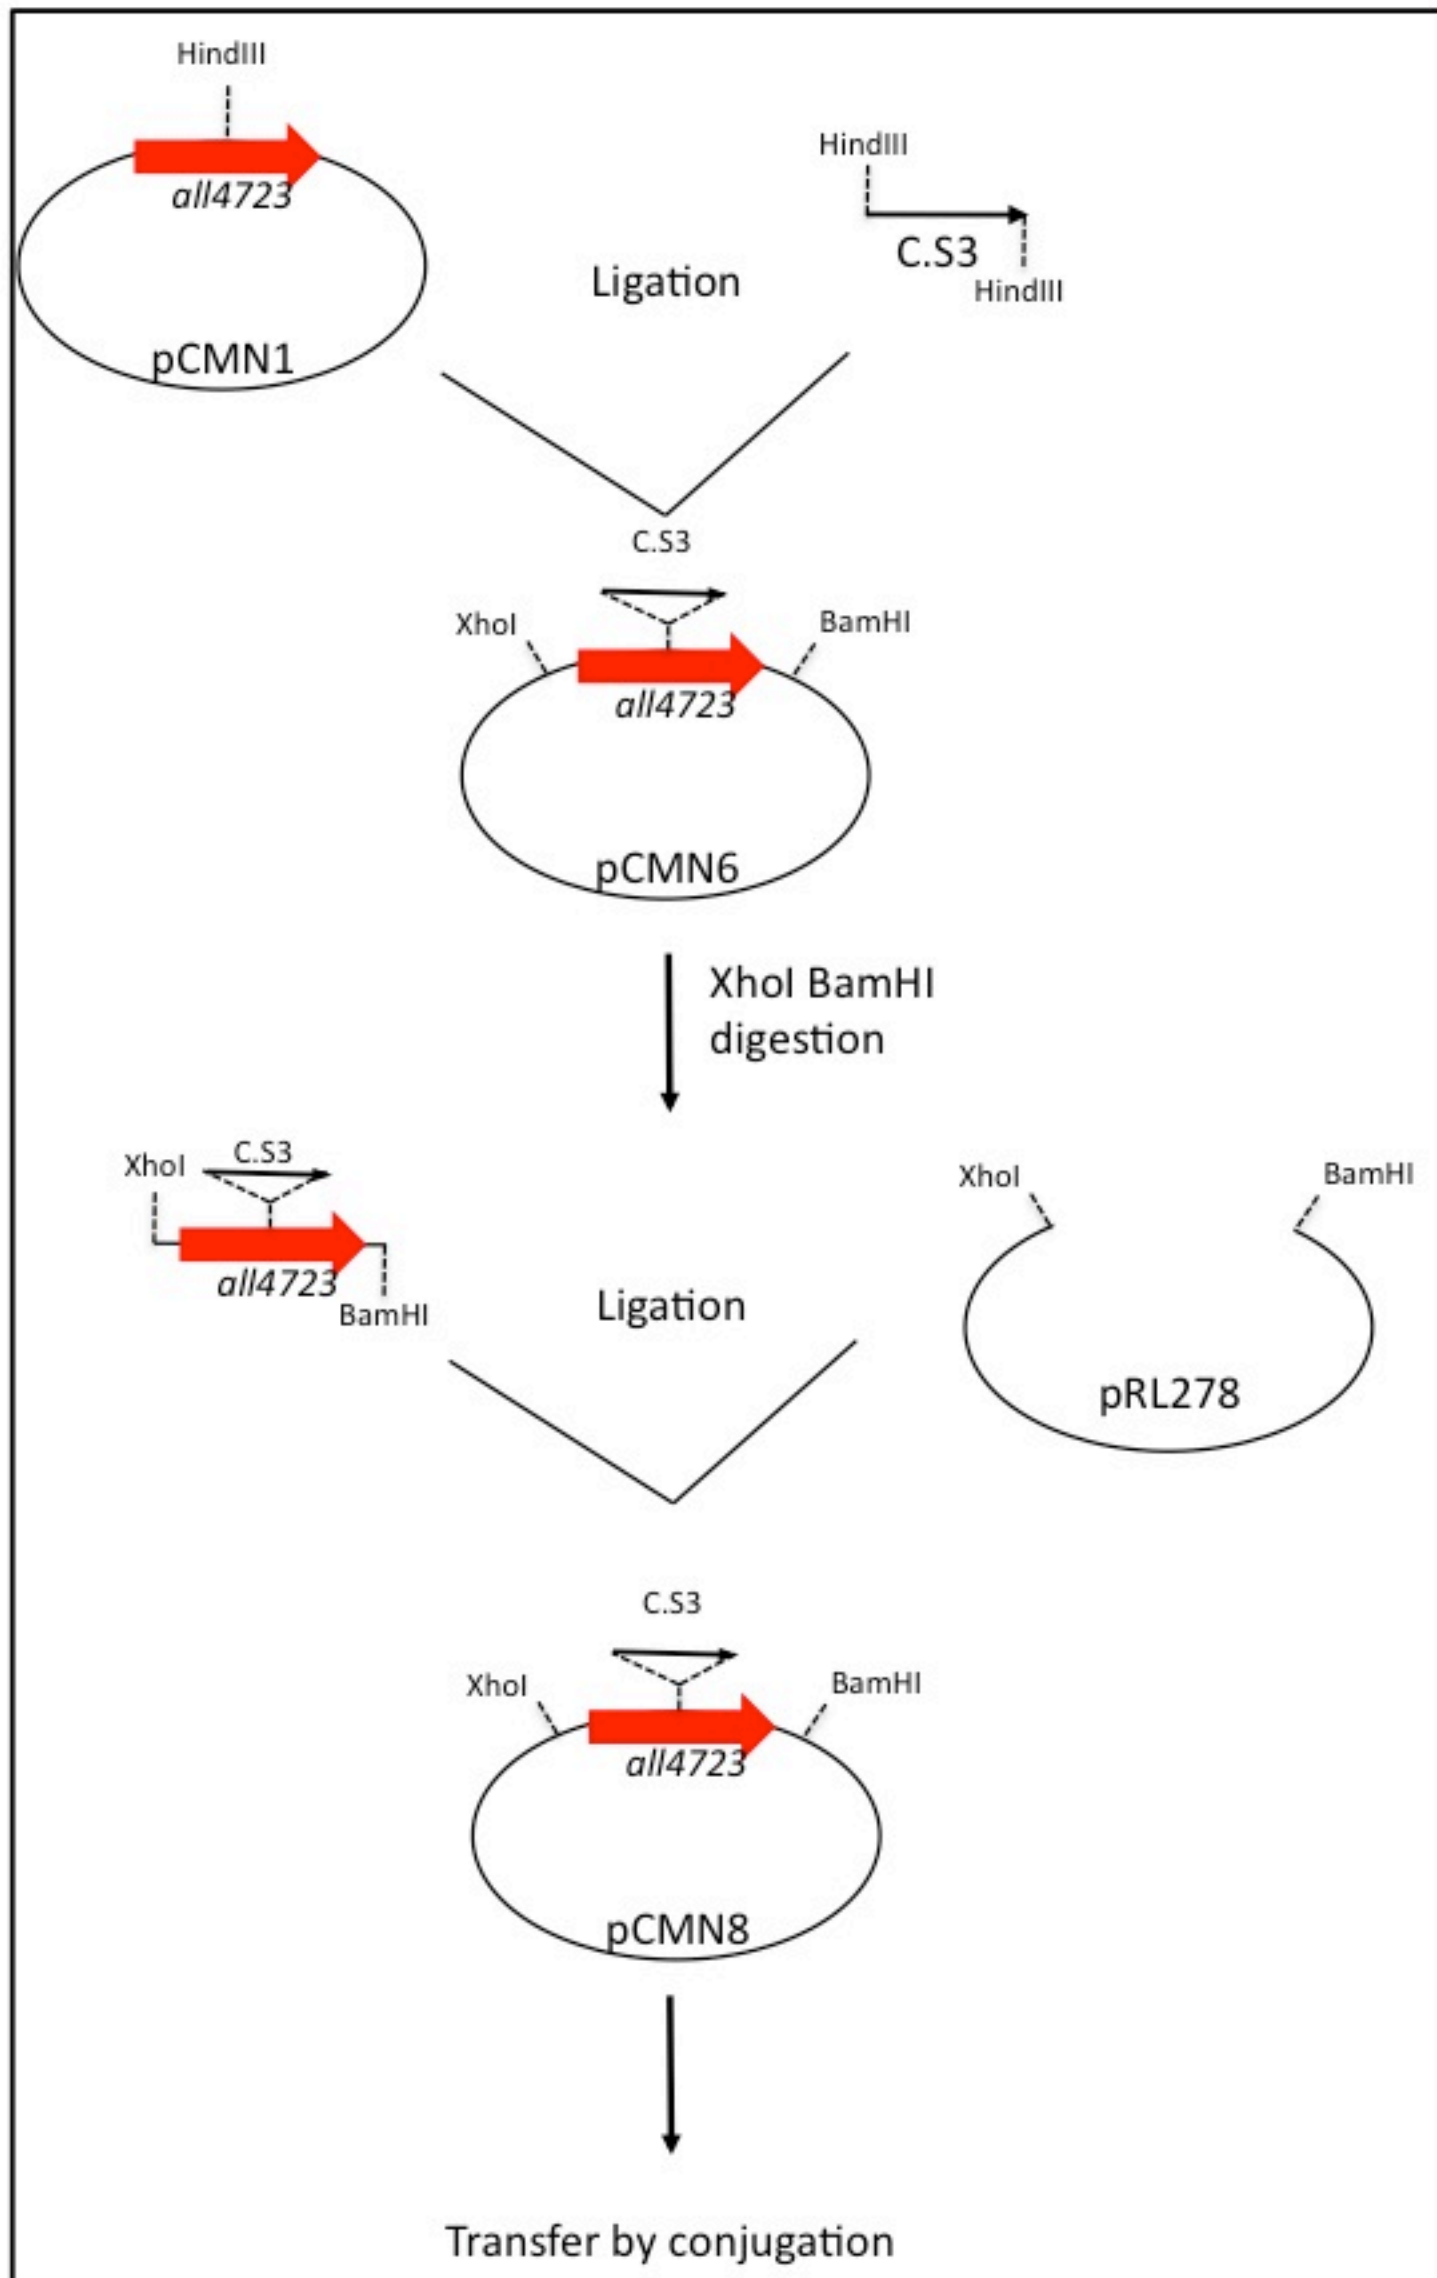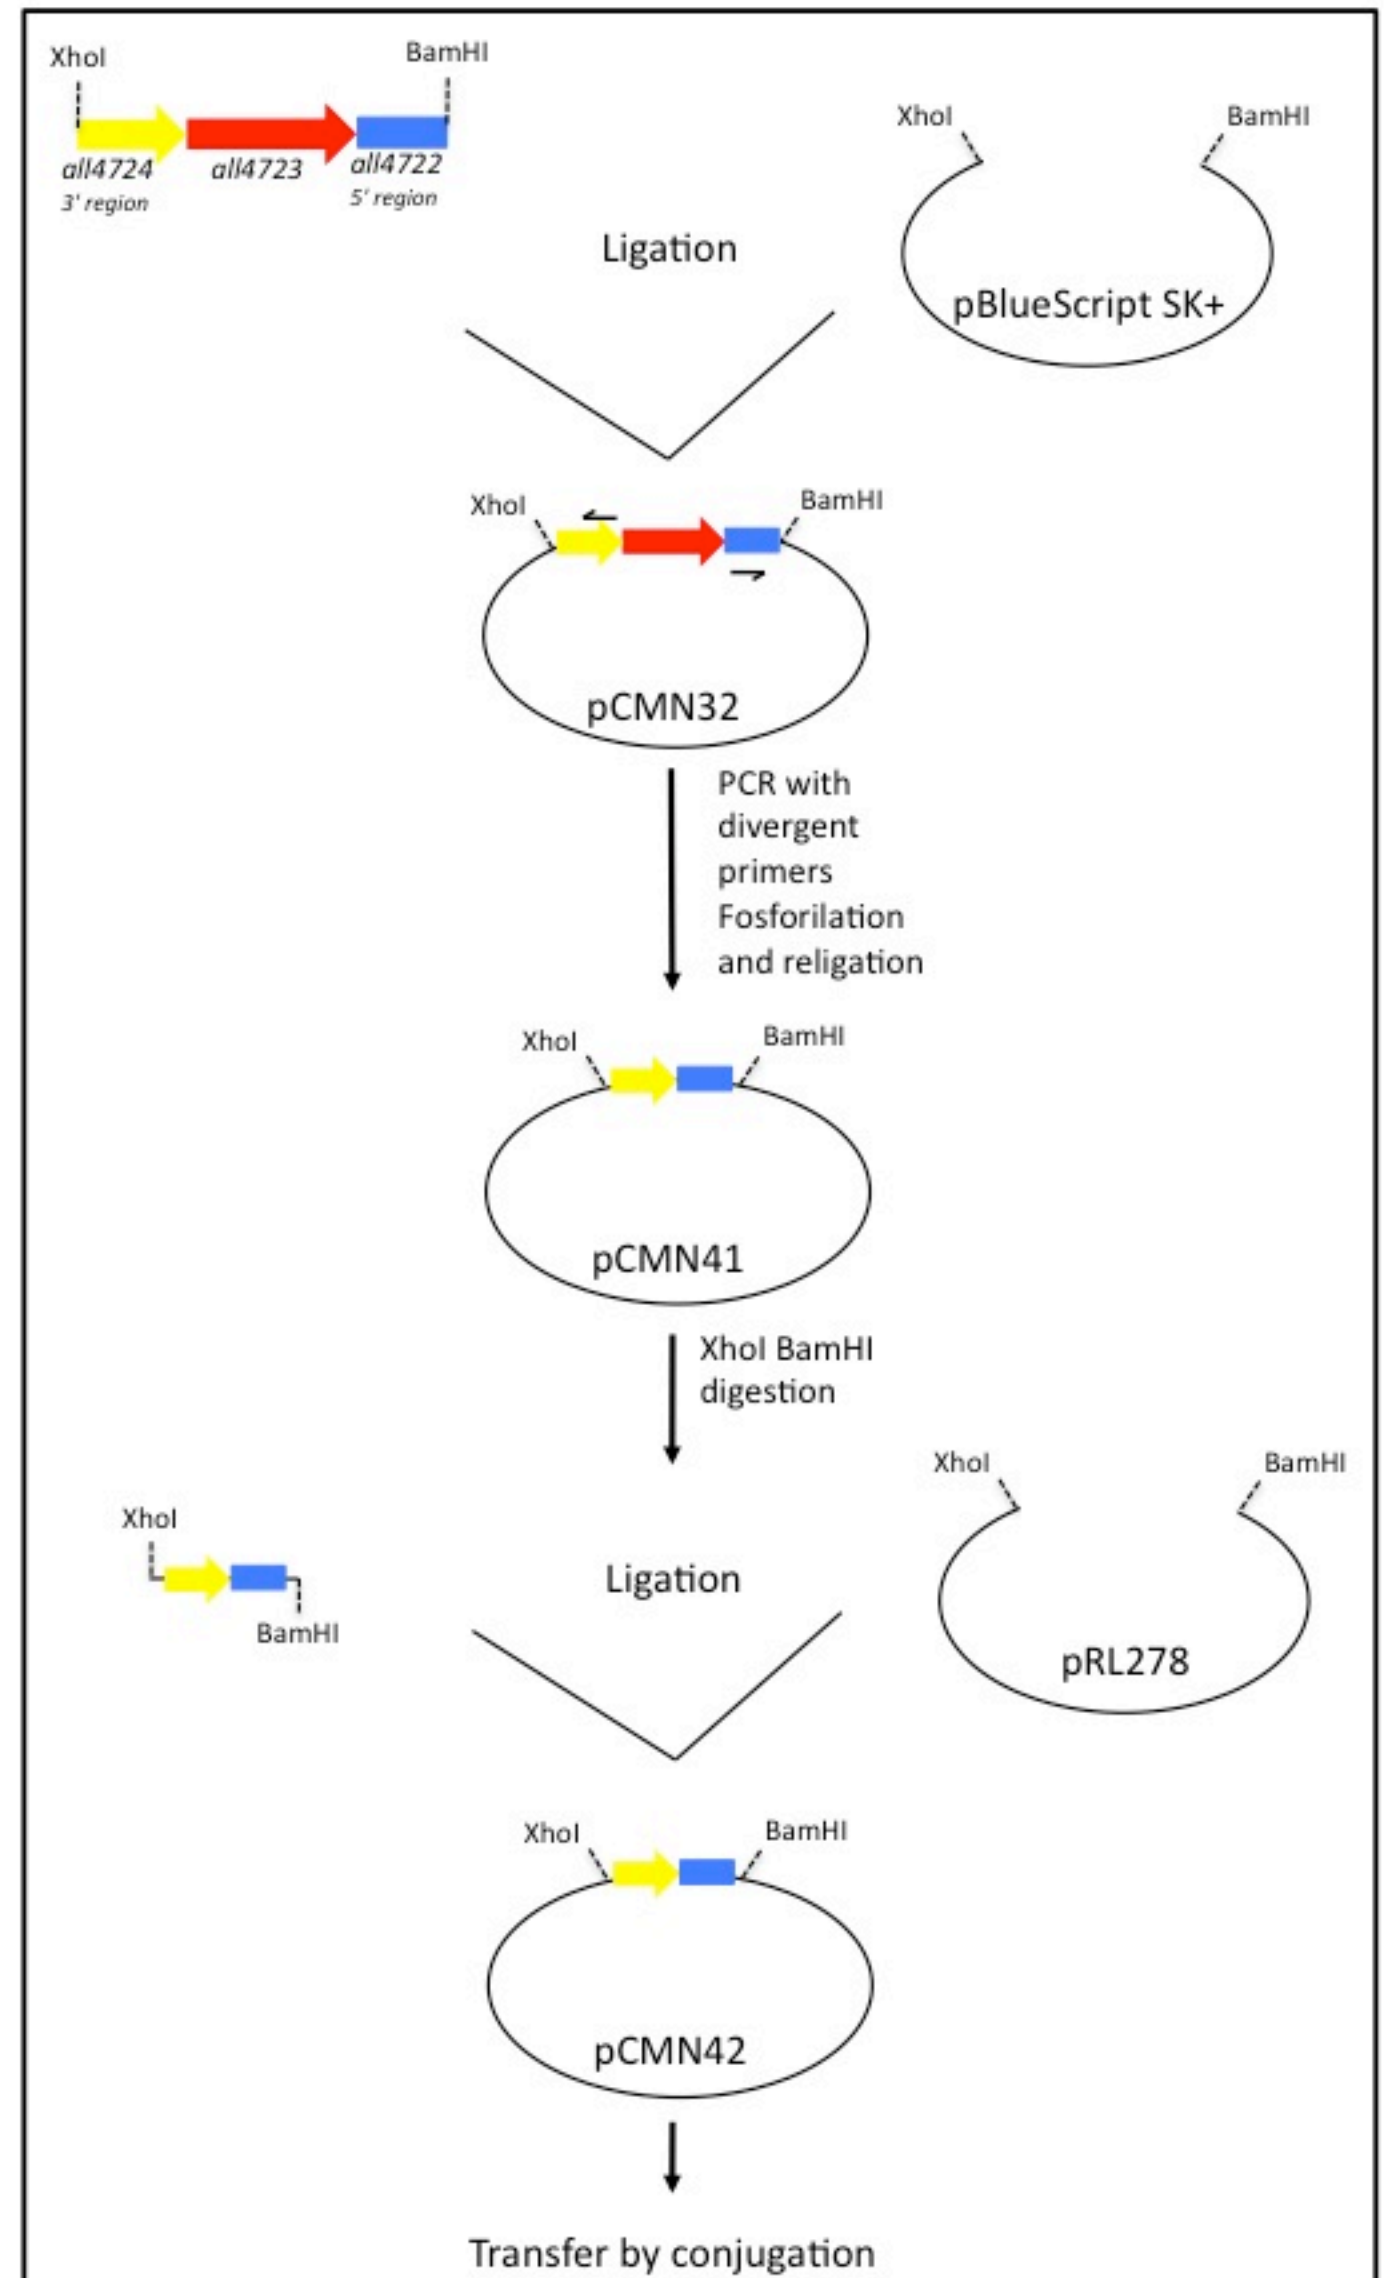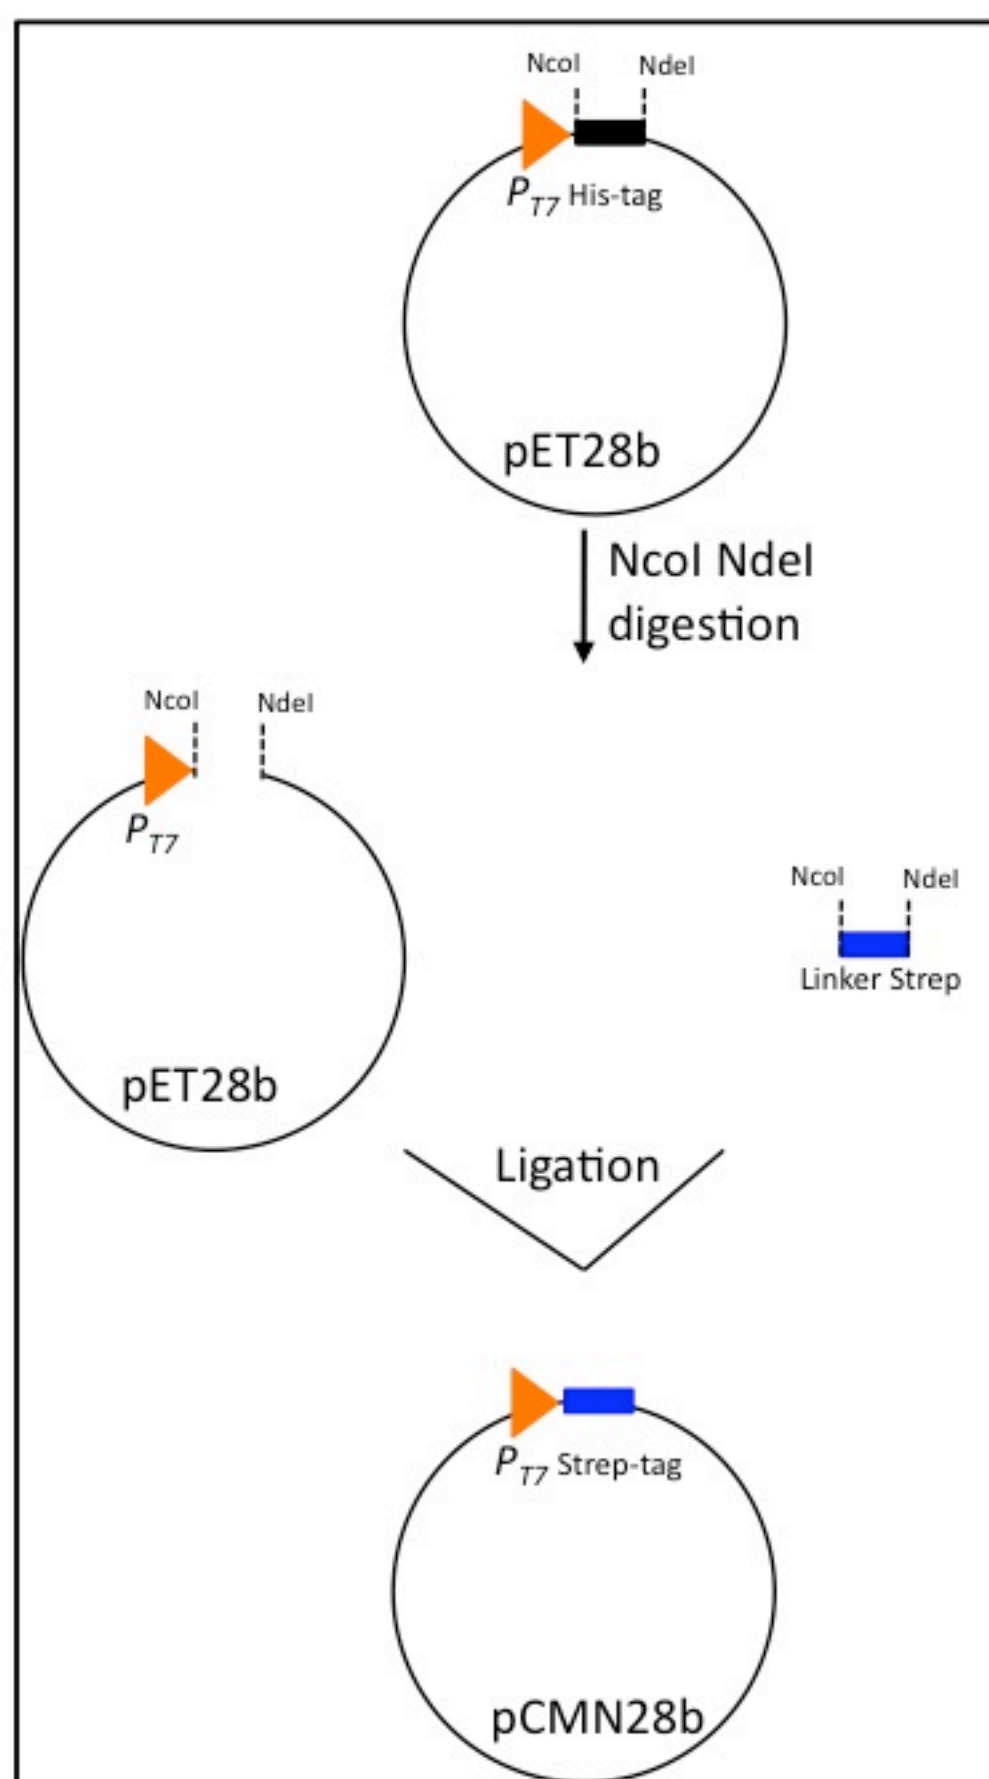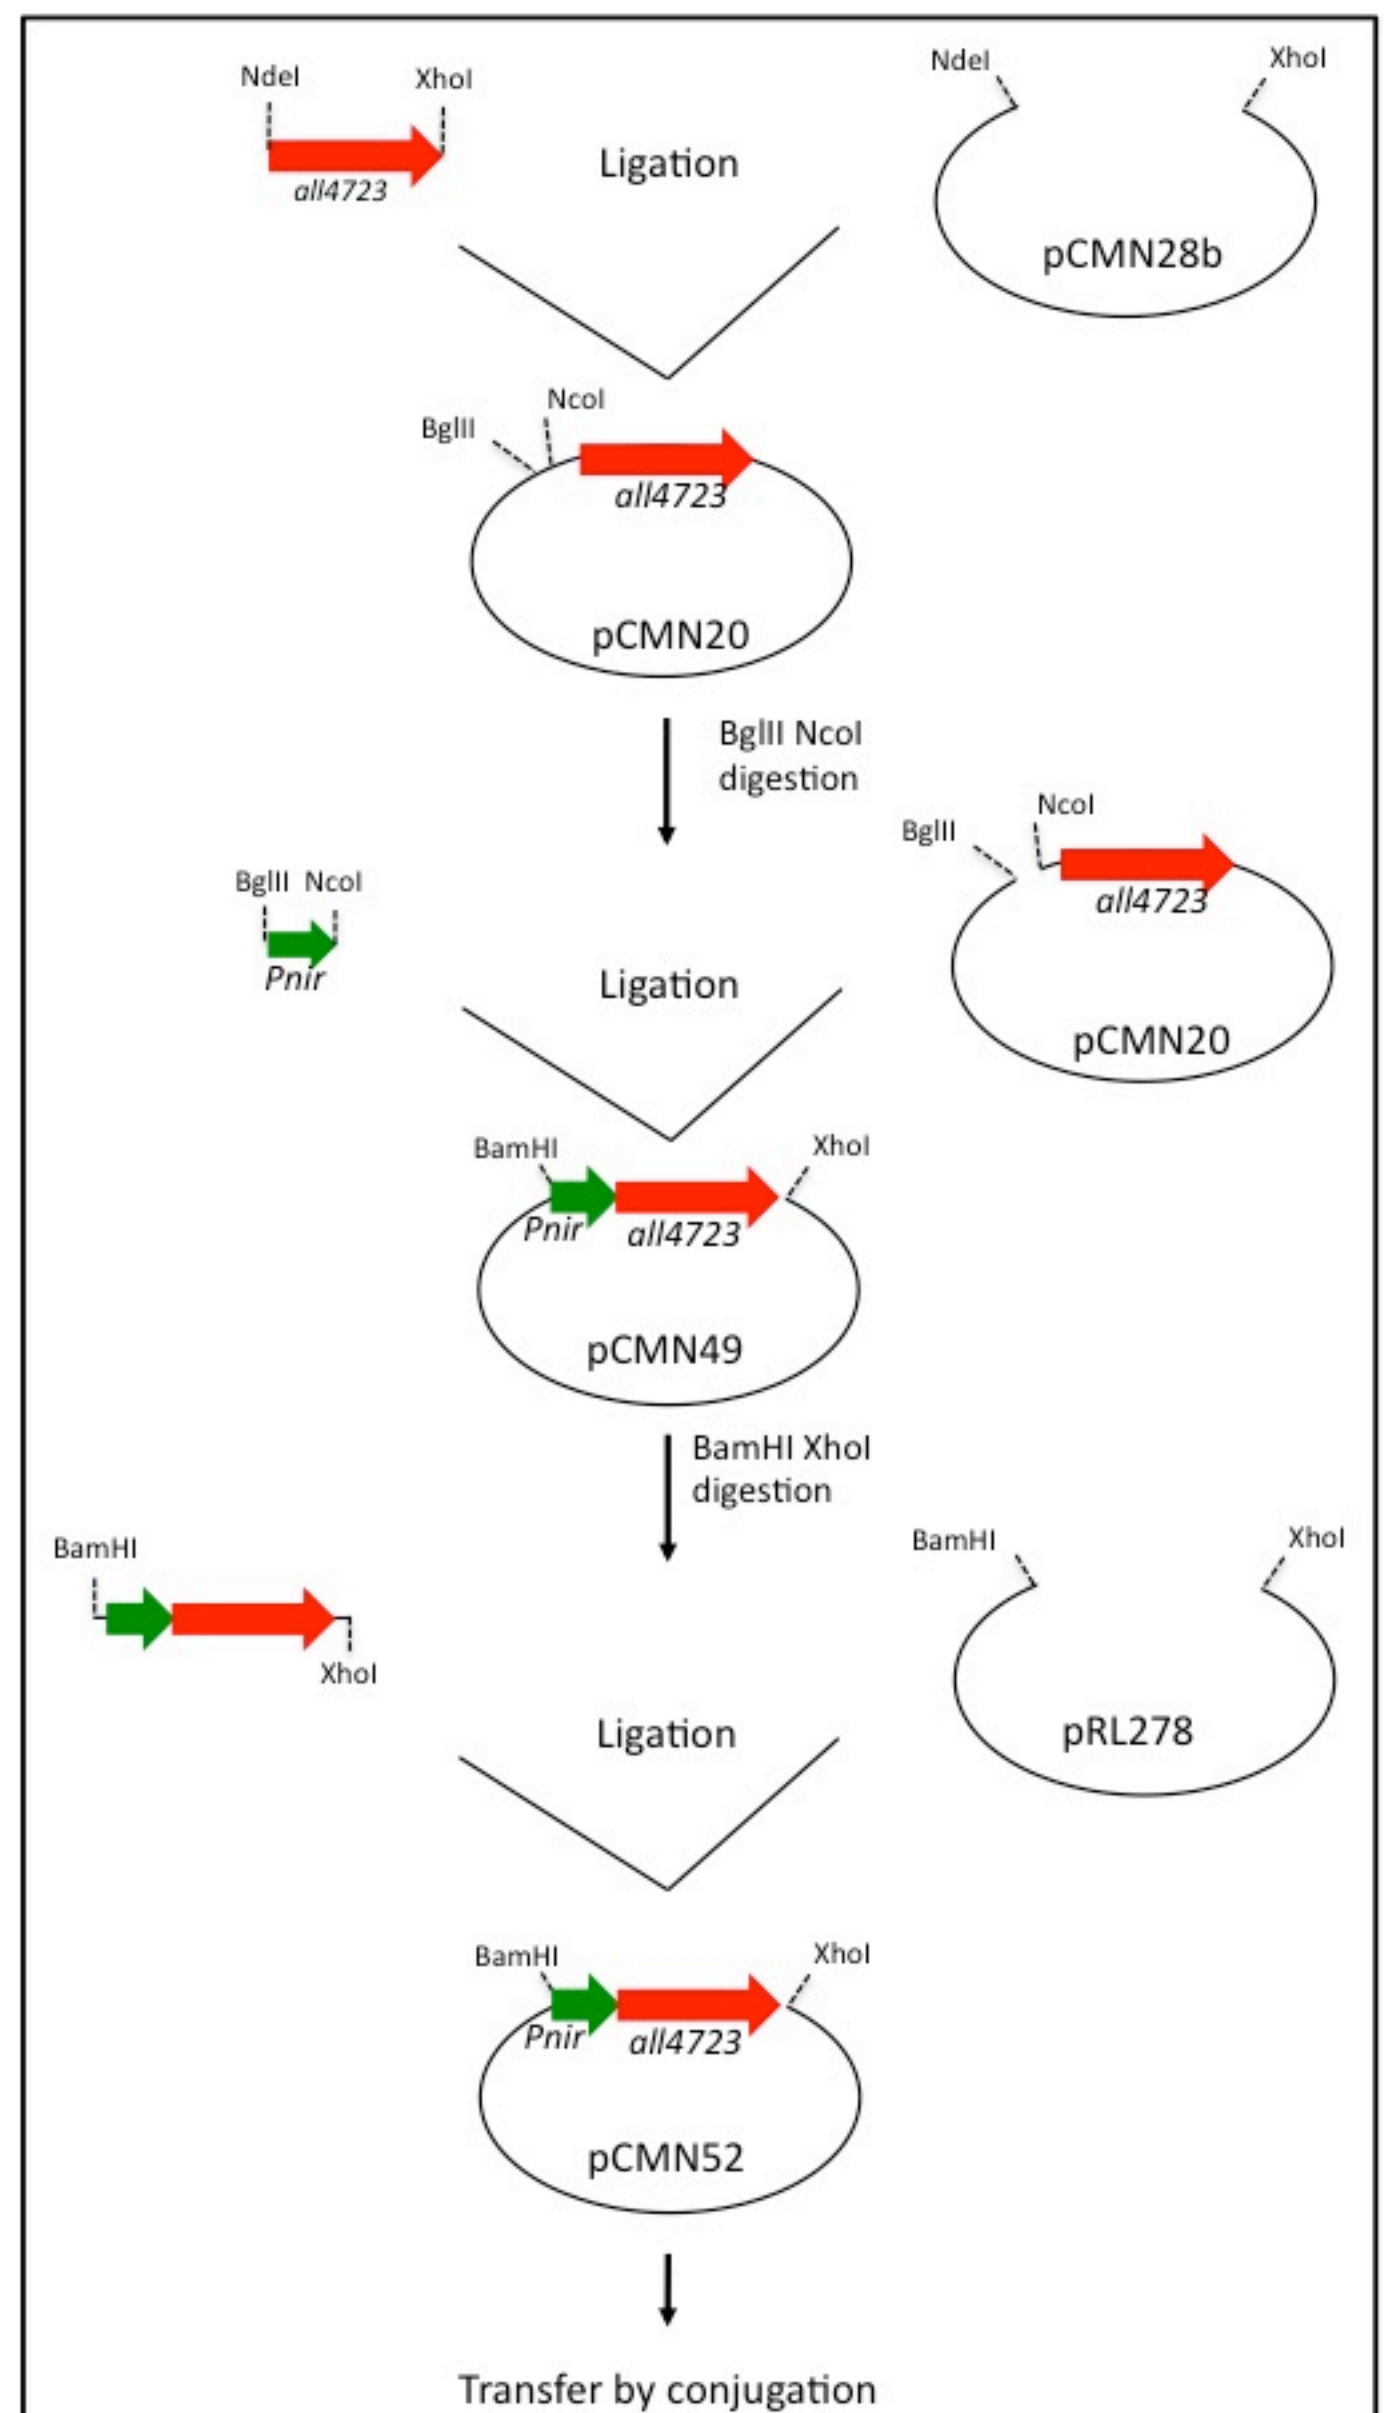

**Fig. S2.** Description of the cloning steps followed for the construction of the plasmids used in this work
